# Supplementary material for: Expression patterns of semaphorin7A and plexinC1 during rat neural development suggest roles in axon guidance and neuronal migration
Source: PubMed Central journal article supplement (PMC2008261; doi:10.1186/1471-213x-7-98), 2007-08-29

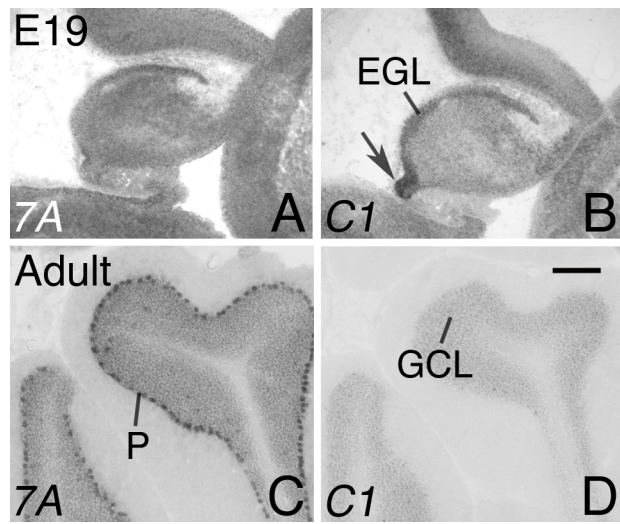

Supplement: 1471-213X-7-98-S2.pdf [file 1471-213X-7-98-S2.pdf]
